# Supplementary material for: Effects of sex and season (breeding and non-breeding) on microhabitat selection in Stejneger’s bamboo pitviper (Viridovipera stejnegeri)
Source: PeerJ. 2025 Feb 25;13:e18970. doi: 10.7717/peerj.18970 (PMC11869892; doi:10.7717/peerj.18970)
Supplement: Supplemental Information 2 [file peerj-13-18970-s002.xlsx]

## Sheet: Summer
T, D, and L represent the names of small locations. T：tangjiazhuang; D: dudukeng; L: luken		M: male; F: female			m		℃	%		m	%	°	°		m	m	m
IField ID	Electronic ID	SEX	Longitude	Latitude	Altitude	Landscape Habitat	Temperature	Humidity	Vegetation types	Vegetation height	Vegetation cover	Slope	Slope aspect	Slope position	Distance from the roads	Distance from water	Distance from residential sites
T1		M	118°1′33.00″	30°13′57.36″	209	Stream	23.7	83.8	Grass	0.3	50	9	124	Down-slope position	3.5	0.05	275
T5	332470	M	118°1′33.10″	30°13′57.88″	210	Stream	23.1	85.7	shrub	2	90	13	36	Down-slope position	4	1.2	257
T8	111880332510	F	118°1′31.35″	30°13′56.90″	211	Stream	23	85.8	Grass	0.3	50	4	41	Mid-slope position	11	0.1	316
T9		F	118°1′30.92″	30°13′56.72″	213	Stream	22.2	89.1	shrub	2	40	4	73	Mid-slope position	5	0.2	327
T10	332550	M	118°1′29.53″	30°13′56.77″	214	Stream	22.9	86.2	Grass	0.2	10	8	84	Mid-slope position	3	1	356
T13	332504	M	118°1′28.45″	30°13′56.27″	222	Stream	21.3	91.4	shrub	0.8	0	12	90	Mid-slope position	5	0.4	383
T14	332479	M	118°1′28.45″	30°13′56.27″	222	Stream	22.8	87.6	Grass	0.3	0	12	90	Mid-slope position	3	1	388
T15	332486	F	118°1′28.45″	30°13′56.27″	222	Stream	22.8	87.6	Grass	0.3	0	12	90	Mid-slope position	4	0.3	390
T16	332459	M	118°1′26.72″	30°13′56.15″	222	Stream	22.1	95.4	shrub	1.5	20	15	105	Mid-slope position	6	1	429
T17	332498	M	118°1′26.72″	30°13′56.15″	222	Stream	22.4	88.1	shrub	1.5	20	15	105	Mid-slope position	5	2	400
T18	332465	F	118°1′25.19″	30°13′52.79″	235	Stream	21.6	92	Grass	0.5	0	5	321	Mid-slope position	1	1	523
T19		F	118°1′25.19″	30°13′52.79″	235	Stream	21.6	92	Grass	0.5	0	5	321	Mid-slope position	2	0.2	524
T20		M	118°1′24.85″	30°13′51.00″	238	Stream	21.2	92.2	shrub	2.5	50	10	85	Mid-slope position	4	0.35	572
T22		M	118°1′23.35″	30°13′48.02″	247	Stream	21.7	88.2	Grass	0.5	10	12	30	Mid-slope position	15	0.2	652
T23	332549	F	118°1′35.09″	30°13′57.29″	217	Stream	20.6	91.3	tree	8	100	8	132	Down-slope position	2.5	7	236
T24	332548	F	118°1′25.78″	30°13′51.82″	238	Stream	21.5	92.4	Grass	0.2	20	6	58	Mid-slope position	2	0.1	533
T25	332473	M	118°1′25.78″	30°13′51.82″	238	Stream	21.5	92.4	Grass	0.2	20	6	58	Mid-slope position	2	0.1	528
D1		M	118°1′35.62″	30°14′27.97″	182	forest	23.6	87.1	tree	5	100	3	104	Down-slope position	2	5	146
D2	332527	F	118°1′20.16″	30°14′27.77″	207	Stream	22.3	90.5	shrub	3	40	12	16	Down-slope position	15	1	169
D3		F	118°1′17.28″	30°14′26.09″	214	Stream	21.2	95.1	shrub	2	20	4	105	Down-slope position	3	0.2	251
D4	332454	F	118°1′16.83″	30°14′26.32″	213	Stream	22.1	94.1	Grass	0.2	50	4	105	Down-slope position	3	1	258
D5	332521	M	118°1′16.83″	30°14′26.32″	213	Stream	21	94.4	tree	5	100	4	105	Down-slope position	5	1.5	258
D6	332524	M	118°1′16.02″	30°14′26.79″	213	Stream	21	95.8	Grass	1	10	19	134	Down-slope position	1.5	1	280
D7		M	118°1′14.07″	30°14′25.44″	215	Stream	21	92.8	Grass	1	10	8	85	Down-slope position	7	1	333
D8	332509	M	118°1′14.07″	30°14′25.44″	215	Stream	20.7	95.2	Grass	0.3	70	8	85	Down-slope position	1.5	1	335
D9	332460	M	118°1′12.17″	30°14′23.93″	227	Stream	20.9	93.7	Grass	0.3	20	7	59	Mid-slope position	1.5	2	396
D10	332462	M	118°1′5.99″	30°14′21.26″	243	Stream	20.7	94	tree	5	100	5	103	Mid-slope position	2	5	577
D11	332508	M	118°1′4.94″	30°14′21.48″	244	Stream	20.7	92.4	Grass	0.3	0	5	103	Mid-slope position	2	0.1	600
D12	332464	F	118°1′0.88″	30°14′20.99″	237	Stream	20.3	14.9	Grass	0.4	30	7	58	Mid-slope position	8	1	709
L1	332518	M	118°1′18.64″	30°16′9.94″	207	Stream	23	94.5	shrub	2	20	16	162	Down-slope position	7	0.7	178
L2	332478	F	118°1′13.08″	30°16′8.41″	200	Stream	22.5	93.5	Grass	0.2	20	4	222	Mid-slope position	10	0.3	306
T26	332487	F	118°1′35.15″	30°13′57.75″	182	Stream	22.4	91.8	Grass	0.5	10	3	136	Down-slope position	4	0.1	232
T27		M	118°1′14.23″	30°14′6.98″	181	Stream	22.5	92.3	shrub	2	80	6	128	Down-slope position	10	0.1	253
T28		M	118°1′11.46″	30°14′5.01″	207	Stream	23	91.3	Grass	0.5	80	5	78	Down-slope position	15	0.2	336
T29		F	118°1′11.46″	30°14′5.01″	207	Stream	23	91.3	shrub	2	20	5	78	Down-slope position	7	0.2	336
T30	332476	M	118°1′8.46″	30°14′5.24″	220	Stream	22.3	93	Grass	0.4	0	7	74	Mid-slope position	8	0.4	401
T31	332522	F	118°1′26.72″	30°13′56.15″	222	Stream	21.9	95.8	Grass	0.2	0	15	105	Mid-slope position	10	0.2	427
T32	332541	M	118°1′5.46″	30°14′2.34″	223	Stream	22.5	93.4	Grass	0.7	10	5	346	Mid-slope position	2	1	516
T33	332451	M	118°1′5.96″	30°14′1.47″	210	Stream	21.9	95	Grass	0.1	0	5	345	Mid-slope position	5	1	525
T34	332489	M	118°1′6.58″	30°14′1.07″	206	Stream	22	95.1	Grass	0	0	9	300	Mid-slope position	5	0.2	521
T35	332502	M	118°1′6.84″	30°14′0.91″	211	Stream	21.5	95.8	Grass	1	0	10	316	Mid-slope position	2	0.3	513
T36	332456	M	118°1′6.84″	30°14′0.91″	211	Stream	21.5	95.8	Grass	1	10	10	316	Mid-slope position	2	1.5	522
T37	332545	M	118°1′5.92″	30°13′51.22″	208	Stream	22.8	89.6	shrub	3	100	3	49	Mid-slope position	10	2	765
T38	332543	M	118°1′4.11″	30°13′58.13″	214	Stream	94.6	21.8	Grass	0	10	5	17	Mid-slope position	2	1	630
t25	2473	M	118°1′5.92″	30°13′51.22″	208	Stream	23.5	85.9	Grass	0.3	20	3	49	Mid-slope position	7	0.1	765
D17		M	118°1′7.04″	30°14′35.41″	185	Stream	22	94.6	Grass	0	0	2	102	Down-slope position	2	0.3	25
D18		F	118°1′1.78″	30°14′36.40″	185	Stream	21.9	93.9	shrub	2	10	8	125	Down-slope position	3	0.5	147
D19		F	118°1′1.78″	30°14′36.40″	185	Stream	22.4	94.4	Grass	1	40	8	125	Down-slope position	2	1.5	147
D20	332455	M	118°0′59.79″	30°14′35.02″	190	Stream	21.6	95.7	shrub	2	100	6	55	Down-slope position	8	1.5	204
D21	332507	M	118°0′58.06″	30°14′34.79″	201	Stream	22.4	92.9	Grass	0.5	0	6	111	Down-slope position	5	0.2	246
Z1		M	118°0′59.79″	30°14′35.02″	190	Stream	88.9	23.2	shrub	2	20	6	55	Down-slope position	8	1	201
D22	332516	M	118°0′55.80″	30°14′34.33″	200	Stream	22.6	92.4	tree	5	100	3	66	Down-slope position	15	4	310
D9	2460	M	118°0′54.04″	30°14′33.30″	195	Stream	21.6	95.1	shrub	1	100	8	83	Down-slope position	15	1	364
D23	332468	F	118°0′54.04″	30°14′33.30″	195	Stream	22.1	92.8	tree	5	30	8	83	Down-slope position	5	1.5	364
D24		M	118°0′50.87″	30°14′31.92″	223	Stream	22	93	Grass	0.5	10	10	107	Mid-slope position	10	0.3	460
D25		M	118°0′47.61″	30°14′30.29″	203	Stream	21.4	95.5	shrub	2.5	50	5	87	Mid-slope position	10	1.5	456
D26		M	118°0′45.90″	30°14′30.53″	212	Stream	21.3	97.2	tree	10	100	10	132	Mid-slope position	2.5	7	596
D27	332513	M	118°0′43.11″	30°14′30.61″	224	Stream	21.1	97.1	tree	8	100	6	91	Mid-slope position	3	10	668
D28		M	118°0′44.76″	30°14′30.72″	203	Stream	21.2	98.1	tree	10	100	2	69	Mid-slope position	4	11	625
D29	332482	M	118°0′52.62″	30°14′32.28″	191	Stream	21.2	96	Grass	0.2	0	7	99	Mid-slope position	7	0.2	411
D30	332477	M	118°0′58.21″	30°14′34.49″	201	Stream	21.3	97	tree	10	100	4	120	Down-slope position	2.5	9	247
T39	332496	F	118°1′11.50″	30°14′51.48″	199	Stream	21.9	94.8	Grass	0.5	10	8	52	Down-slope position	9	0.15	181

## Sheet: pseudo-absence points
		m	1. Stream; 2. Forest; 3. Agricultural.	℃	%	1. Grass; 2. Shrub; 3. Tree.	m	%	°	°	1. Down-slope position; 2. Mid-slope position; 3. Up-slope position.	m	m	m
IField ID	Latitude and longitude	Altitude	Landscape Habitat	Temperature	Humidity	Vegetation types	Vegetation height	Vegetation cover	Slope	Slope aspect	Slope position	Distance from the roads	Distance from water	Distance from residential sites
1	118°3′8.00″，30°13′55.13″	252	2	26.2	64.1	3	6	100	30	72	2	10	40	480
2	118°2′34.63″，30°14′4.33″	215	2	26.8	66.5	3	10	100	23	354	2	100	100	1207
3	118°1′18.63″，30°14′34.99″	174	2	29.4	63.2	2	1	100	15	57	1	10	100	92
4	118°1′28.02″，30°14′22.77″	252	2	27.9	69.2	3	5	100	0	142	2	100	100	262
5	118°1′19.71″，30°14′34.57″	172	2	31.2	60.3	2	0	0	5	35	1	0	20	55
6	118°0′41.98″，30°14′36.46″	312	2	28.3	64.5	3	5	100	30	317	3	30	100	955
7	118°1′54.98″，30°15′14.83″	165	1	25.1	82.5	1	0	0	0	10	1	50	0	577
8	118°0′58.76″，30°15′15.79″	258	2	26.3	68.2	3	5	80	25	175	1	30	40	1072
9	118°0′47.93″，30°16′41.13″	332	2	26.8	52.2	3	10	100	12	240	2	100	100	919
10	118°0′13.46″,30°13′27.61″	412	2	27.5	40.2	3	9	100	20	278	2	50	100	1042
11	118°2′13.87″,30°15′7.55″	194	1	24.1	72.5	1	6	100	5	312	1	10	9	980
12	118°2′31.88″,30°13′53.1″	422	2	23.2	46.2	3	12	100	45	89	3	100	100	1398
13	118°0′9.81″,30°17′16.14″	445	2	25.2	67.2	3	8	90	44	288	3	100	100	2427
14	118°0′23.82″,30°13′57.19″	443	2	23.3	67.8	3	15	100	30	212	3	30	100	1516
15	118°1′33.77″,30°15′28.48″	192	3	24.6	58.9	2	2	60	15	92	2	2	8	44
16	118°0′59.99″,30°15′49.93″	252	2	27.3	64.4	3	9	100	20	75	2	100	20	1042
17	118°2′33.88″,30°15′19.5″	393	2	22.6	48.6	3	12	100	20	212	2	100	100	1173
18	118°2′44.95″,30°16′46.46″	235	2	27.6	33.2	3	8	100	15	211	2	100	100	862
19	118°0′45.82″,30°14′59.38″	453	2	24.3	59.1	3	20	100	45	235	3	100	100	958
20	118°0′22.52″,30°15′1.39″	593	2	25.3	61.1	3	20	100	23	358	3	100	100	887
21	118°1′36.88″,30°16′51.71″	275	2	28.3	61.2	3	8	100	15	85	2	100	100	397
22	118°1′48.68″,30°15′5.99″	186	2	25.3	68.8	3	13	100	3	295	1	20	100	792
23	118°2′36.4″,30°14′17.32″	229	2	26.3	55.3	2	3	60	10	178	1	3	50	1048
24	118°0′17.50″,30°14′23.41″	258	2	23.2	78.3	3	6	90	10	233	2	20	30	1528
25	118°2′36.9″,30°17′5.86″	276	2	27.5	55.3	3	12	100	6	265	2	100	100	857
26	118°0′51.26″,30°16′40.2″	281	2	27.2	51.2	2	2	40	30	199	1	40	50	854
27	118°0′37.64″,30°15′50.94″	397	2	28.3	67.7	3	14	100	40	15	3	100	50	1032
28	118°2′49.68″,30°14′51.63″	345	1	25.2	59.3	1	8	90	15	268	2	10	10	1384
29	118°2′52.16″,30°14′48.78″	389	2	25.5	62.2	3	9	100	20	268	3	100	50	1275
30	118°0′32.54″,30°17′5.64″	522	2	26.4	48.9	2	3	60	30	70	3	100	100	1798
31	118°0′34.44″,30°15′49.28″	425	2	25.3	70.6	3	13	100	20	6	3	100	100	1128
32	117°59′48.77″,30°14′56.62″	175	3	28.5	45.3	2	2	30	3	266	1	3	100	91
33	118°2′57.75″,30°13′48.55″	293	2	27.9	56.3	2	3	90	20	60	1	20	100	582
34	118°0′48.16″,30°13′26.70″	474	2	23.2	66.9	3	10	100	19	45	3	100	100	1040
35	118°1′3.53″,30°14′0.2″	375	2	23.9	69.3	3	20	100	35	105	3	100	100	582
36	118°0′4.83″,30°13′42.37″	377	2	25.5	61.5	3	15	100	15	120	2	100	100	890
37	118°1′53.1″,30°16′36.47″	185	2	27.2	59.4	2	3	80	15	60	1	5	30	243
38	118°2′51.42″,30°16′12.92″	347	2	24.3	64.6	3	16	100	20	235	3	100	100	1690
39	118°2′39.20″,30°15′55.67″	326	2	24.5	65.8	3	15	100	30	75	3	100	100	1172
40	118°0′28.88″,30°16′41.89″	478	2	27.3	58.8	3	15	70	25	116	3	100	100	1294
41	118°1′24.96″,30°13′33.1″	481	2	25.1	65.9	3	21	100	39	335	3	100	100	36
42	118°1′45.90″,30°15′4.66″	169	1	25.1	69.5	3	16	100	2	231	1	100	5	795
43	118°0′25.23″,30°15′11.52″	389	2	28.2	54.7	2	2	50	30	229	3	100	100	921
44	118°2′20.20″,30°16′12.98″	247	2	25.5	52.5	3	9	100	15	252	2	100	100	952
45	118°2′58.54″,30°13′51.64″	272	2	28.2	49.7	2	2	80	10	91	1	30	100	557
46	118°2′32.20″,30°16′7.36″	376	2	26.4	61.2	2	11	100	15	317	3	100	100	1179
47	118°0′26.83″,30°16′23.91″	461	2	25.3	55.9	3	13	90	15	121	2	100	100	1079
48	118°1′52.27″,30°14′0.23″	206	2	24.5	60	3	15	100	8	79	1	100	50	806
49	118°2′55.97″,30°14′37.56″	476	2	24.2	59.3	3	20	100	40	189	3	100	100	1122
50	118°3′19.49″,30°13′56.53″	292	2	24.3	62	3	15	100	9	162	1	50	40	158

## Sheet: Autumn
T, D, and L represent the names of small locations. T：tangjiazhuang; D: dudukeng; L: luken		M: male; F: female			m		℃	%		m	%	°	°		m	m	m
IField ID	Electronic ID	SEX	Longitude	Latitude	Altitude	Landscape Habitat	Temperature	Humidity	Vegetation types	Vegetation height	Vegetation cover	Slope	Slope aspect	Slope position	Distance from the roads	Distance from water	Distance from residential sites
T3	2522	F	118°1'11.87	30°14'05.72	180	stream	25.1	93.2	shrub	1.5	55	4	66	Down-slope position	7	0.5	309
T11		F	118°1'11.87	30°14'05.72	189	stream	25.2	92.5	grass	0.5	60	4	66	Down-slope position	10	0.4	309
T12	1449	F	118°1'10.78	30°14'05.28	190	stream	24.7	94.6	shrub	5	90	7	87	Down-slope position	10	0.2	351
T13		F	118°1'10.78	30°14'05.28	210	stream	24.4	95.1	grass	0.3	70	7	87	Down-slope position	7	0.1	351
T6	2456	M	118°1'05.35	30°14'02.82	223	stream	24.6	95.9	tree	3	100	9	360	Mid-slope position	2.5	9	489
T8	2543	M	118°1'04.45	30°13'58.63	228	stream	24.4	96.3	grass	0.7	30	4	221	Mid-slope position	1	0.5	569
D1	1408	M	118°1'07.44	30°14'35.44	184	stream	24.7	94.6	tree	3	100	2	84	Down-slope position	10	1.2	15
D8	2468	F	118°0'57.94	30°14'35.18	192	stream	24.4	95.1	grass	0.2	40	8	126	Down-slope position	10	0.3	250
D9	2507	M	118°0'55.16	30°14'33.37	229	stream	25	93.1		0.2	10	5	61	Mid-slope position	4	0.3	337
T1	2487	F	118°1'17.87	30°14'07.04	170	stream	23.5	91.4	tree	5	100	15	35	Down-slope position	10	0.3	189
T2	1410	M	118°1'17.87	30°14'07.04	170	stream	23.5	92.7	shrub	3	100	15	35	Down-slope position	15	2.5	189
T3	2522	F	118°1'12.23	30°14'06.83	196	stream	23.8	91.4	grass	0.1	10	5	15	Down-slope position	13	3	319
T4	2470	M	118°1'12.23	30°14'06.83	196	stream	23.2	92.8	grass	0.1	60	5	15	Mid-slope position	20	2.5	289
T5	1376	M	118°1'09.09	30°14'04.89	217	stream	23.1	92.5	shrub	0.5	50	8	102	Mid-slope position	8	0.2	375
T6	2456	M	118°1'05.23	30°14'02.72	213	stream	23.8	90.2	grass	0.3	10	7	359	Mid-slope position	3	0.2	489
T7	2476	M	118°1'05.92	30°14'01.69	220	stream	22.8	94.2	grass	0.5	10	8	358	Mid-slope position	6	10	518
T8	2543	M	118°1'05.04	30°13'59.60	230	stream	22.7	95.7	grass	0.2	20	8	70	Mid-slope position	1	1.5	603
T9	1407	F	118°1'04.34	30°13'58.38	236	stream	23	92.7	grass	0.3	40	5	10	Mid-slope position	8	0.8	607
T10	2489	M	118°1'04.63	30°13'58.91	235	stream	23.1	93.8	tree	5	100	4	47	Mid-slope position	1	7	589
L1		M	118°0'49.41	30°16'20.70	166	stream	24.4	92.6	grass	0.5	0	5	63	Down-slope position	15	2	466
L2		F	118°0'48.73	30°16'17.73	176	stream	24.1	96.2	tree	5	50	5	3	Mid-slope position	15	3	454
L3		F	118°0'48.73	30°16'17.73	176	stream	24.6	96.2	tree	5	50	5	3	Mid-slope position	15	3	454
L4		F	118°0'45.87	30°16'15.83	193	stream	23.5	94.6	tree	5	70	5	100	Mid-slope position	20	1.5	523
L5		F	118°1'05.74	30°16'13.43	158	stream	23.1	98	grass	1.5	50	3	190	Down-slope position	2	7	7
D2		F	118°1'00.16	30°14'35.29	183	stream	23.1	92.7	grass	0.1	10	6	62	Down-slope position	2	1	191
D3	1382	M	118°1'00.16	30°14'35.29	183	stream	22.9	93.9	grass	0.3	20	6	62	Down-slope position	3	0.5	191
D4	1360	F	118°0'53.09	30°14'32.33	201	stream	22.8	94.3	shrub	2	60	5	63	Down-slope position	4	0.5	398
D5	1417	F	118°0'52.10	30°14'31.96	211	stream	22.7	94.1	grass	0.2	10	10	75	Down-slope position	3	0.3	426
D6	1406	M	118°0'52.10	30°14'31.96	211	stream	22.7	94.1	grass	0.2	10	10	75	Down-slope position	3	0.3	426
D7	1380	M	118°0'44.81	30°14'30.98	221	stream	22.5	95	shrub	3	80	12	85	Mid-slope position	10	4	621
